# **A Large-Scale Genome-Wide Gene-Sleep Interaction Study in 732,564 Participants Identifies Lipid Loci Explaining Sleep- Associated Lipid Disturbances**

Raymond Noordam[1]#, Wenyi Wang[2]#, Pavithra Nagarajan[3]#, Heming Wang[3, 4]#, Michael R Brown[5]#, Amy R Bentley[6]#, Qin Hui[7], Aldi T Kraja[8], John L Morrison[9], Jeffrey R O'Connell[10], Songmi Lee[11], Karen Schwander[12], Traci M Bartz[13], Lisa de las Fuentes[14, 15], Mary F Feitosa[12], Xiuqing Guo[16], Xu Hanfei [17], Sarah E Harris[18], Zhijie Huang[19], Mart Kals[20], Christophe Lefevre[21], Massimo Mangino[22], Yuri Milaneschi[23, 24], Peter van der Most[25], Natasha L Pacheco[26], Nicholette D Palmer[27], Varun Rao[28], Rainer Rauramaa[29], Quan Sun[30], Yasuharu Tabara[31, 32], Dina Vojinovic[33], Yujie Wang[34], Stefan Weiss[35, 36], Qian Yang[37, 38], Wei Zhao [39, 40], Wanying Zhu[41], Md Abu Yusuf Ansari[42], Hugues Aschard[43, 44], Pramod Anugu[45], Themistocles L Assimes[46, 47], John Attia[48], Laura D Baker[49], Christie Ballantyne[50], Lydia Bazzano[20], Eric Boerwinkle[5, 51], Brain Cade[3, 4], Hung-hsin Chen[41], Wei Chen[20], Yii-Der Ida Chen[17], Zekai Chen[25], Kelly Cho[52, 53], Ileana De Anda-Duran[20], Latchezar Dimitrov[27], Anh Do[54], Todd Edwards[55], Tariq Faquih[3, 4], Aroon Hingorani[56], Susan P Fisher-Hoch[57], J. Michael Gaziano [52, 53], Sina A Gharib[58], Ayush Giri[55, 59], Mohsen Ghanbari[33], Hans Jörgen Grabe[60, 61], Mariaelisa Graff[34], C Charles Gu[54], Jiang He[20], Sami Heikkinen[62], James Hixson[63], Yuk-Lam Ho[53], Michelle M Hood[39], Serena C Houghton[53], Carrie A Karvonen-Gutierrez[39], Takahisa Kawaguchi[31], Tuomas O Kilpeläinen[64, 65], Pirjo Komulainen[29], Henry J Lin[17], Gregorio V Linchangco Jr. [7, 66], Annemarie I Luik[33], Jintao Ma[67], James B Meigs[68, 69, 70], Joseph B McCormick[57], Cristina Menni[23], Ilja M Nolte[25], Jill M Norris[71], Lauren E Petty[41], Hannah G Polikowsky[41], Laura M Raffield[72], Stephen S Rich[73, 74], Renata L Riha[75], Thomas C Russ[76, 77], Edward A Ruiz-Narvaez[78], Colleen M Sitlani[79], Jennifer A Smith[39, 40], Harold Snieder[25], Tamar Sofer[3, 80], Botong Shen[26], Jingxian Tang[18], Kent D Taylor[81], Maris Teder-Laving[21], Rima Triatin[25, 82], Michael Y Tsai[83], Henry Völzke[36, 84], Kenneth E. Westerman[68, 69, 85], Rui Xia[11], Jie Yao[17], Kristin L Young[34], Ruiyuan Zhang[20], Alan B Zonderman[26], Xiaofeng Zhu[86], Jennifer E Below[41], Simon R Cox[19], Michelle Evans[26], Myriam Fornage[5, 11], Ervin R Fox[87], Nora Franceschini[88],

Sioban D Harlow[39], Elizabeth Holliday[48], M. Arfan Ikram[33], Tanika Kelly[28], Timo A Lakka[29, 62, 89], Deborah A Lawlor[37, 38], Changwei Li[12], Ching-Ti Liu[18], Reedik Mägi[21], Alisa K Manning[90, 91], Fumihiko Matsuda[31], Alanna C Morrison[5], Matthias Nauck[36, 92], Kari E North[34], Brenda WJH Penninx[23, 24], Michael A Province[12], Bruce M Psaty[79, 93], Jerome I Rotter[17], Tim D Spector[23], Lynne E Wagenknecht[94], Ko Willems van Dijk[2, 95], Lifelines Cohort Study[96], Million Veteran Program, Cashell E Jaquish[97], Peter WF Wilson[7, 66], Patricia A Peyser[39], Patricia B Munroe[98, 99], Paul S de Vries[5], W James Gauderman[9], Yan V Sun[7, 66], Han Chen[5]#, Clint L Miller[100, 101]#, Thomas W Winkler[102]#, Dabeeru C Rao[54]#, Susan Redline[3, 4]#, Diana van Heemst[1]#

#writing group

1. Department of Internal Medicine, Section of Gerontology and Geriatrics, Leiden University Medical Center, Leiden, the Netherlands.
2. Department of Human Genetics, Leiden University Medical Center, Leiden, the Netherlands.
3. Division of Sleep and Circadian Disorders, Department of Medicine, Brigham and Women's Hospital, Boston, MA, USA.
4. Division of Sleep Medicine, Harvard Medical School, Boston, MA, USA.
5. Department of Epidemiology, University of Texas Health Science Center at Houston School of Public Health, Houston, Texas, USA.
6. Center for Research on Genomics and Global Health, National Human Genome Research Institute, National Institutes of Health, Bethesda, MD 20892, USA.
7. Rollins School of Public Health, Department of Epidemiology, Emory University, Atlanta, Georgia, USA.
8. University of Mississippi Medical Center, Jackson, MS, USA.
9. Division of Biostatistics, Department of Population and Public Health, University of Southern California, Los Angeles, CA, USA.
10. Division of Endocrinology, Diabetes and Nutrition, Department of Medicine, University of Maryland School of Medicine, Baltimore, MD, USA.
11. Brown Foundation Institute of Molecular Medicine, University of Texas Health Science Center at Houston, McGovern Medical School, Houston, Texas, USA.
12. Division of Statistical Genomics, Department of Genetics, Washington University School of Medicine, St. Louis, MO, USA.

13. Cardiovascular Health Research Unit, Department of Biostatistics and Medicine, University of Washington, Seattle, WA, USA.
14. Center for Biostatistics and Data Science, Institute for Informatics, Data Science and Biostatistics, Washington University in St. Louis, St. Louis, Missouri, USA.
15. Cardiovascular Division, Department of Medicine, Washington University School of Medicine, St. Louis, MO, 63110, USA.
16. The Institute for Translational Genomics and Population Sciences, Department of Pediatrics, The Lundquist Institute for Biomedical Innovation at Harbor-UCLA Medical Center, Torrance, CA, USA.
17. Department of Biostatistics, Boston University, Boston, MA, USA.
18. Lothian Birth Cohorts, Department of Psychology, The University of Edinburgh, Edinburgh, UK.
19. Department of Epidemiology, Tulane University School of Public Health and Tropical Medicine, New Orleans, LA, USA.
20. Estonian Genome Center, Institute of Genomics, University of Tartu, Tartu, Estonia.
21. Department of Bioinformatics, Hunter Medical Research Institute, New Lambton Heights, NSW, Australia.
22. Department of Twin Research, King's College London, London, UK.
23. GGZ inGeest, Amsterdam, the Netherlands.
24. Department of Psychiatry, Amsterdam UMC/Vrije universiteit, Amsterdam, the Netherlands.
25. Department of Epidemiology, University of Groningen, University Medical Center Groningen, Groningen, the Netherlands.
26. National Institute on Aging, Laboratory of Epidemiology and Population Sciences, National Institutes of Health, Baltimore, Maryland, USA.
27. Department of Biochemistry, Wake Forest University School of Medicine, Winston-Salem, NC, USA.
28. Division of Nephrology, Department of Medicine, University of Illinois Chicago, Chicago, IL, USA.
29. Kuopio Research Institute of Exercise Medicine, Kuopio, Finland.
30. Department of Biostatistics, University of North Carolina at Chapel Hill, Chapel Hill, NC, USA.
31. Center for Genomic Medicine, Kyoto University Graduate School of Medicine, Kyoto, Japan.

32. Graduate School of Public Health, Shizuoka Graduate University of Public Health, Shizuoka, Japan.
33. Department of Epidemiology, Erasmus MC University Medical center, Rotterdam, the Netherlands.
34. Department of Epidemiology, University of North Carolina Gillings School of Global Public Health, Chapel Hill, NC, USA.
35. Department of Functional Genomics, Interfaculty Institute for Genetics and Functional Genomics, University Medicine Greifswald, Greiswald, Germany.
36. DZHK (German Center for Cardiovascular Research), partner site Greifswald, Greiswald, Germany.
37. MRC Integrative Epidemiology Unit at then University of Bristol, Bristol, UK.
38. Population Health Sciences, Bristol Medical School, University of Bristol, Bristol, UK.
39. Department of Epidemiology, School of Public Health, University of Michigan, Ann Arbor, MI, USA.
40. Survey Research Center, Institute for Social Research, University of Michigan, Ann Arbor, MI, USA.
41. Division of Genetic Medicine, Department of Medicine, Vanderbilt University Medical Center, Nashville, TN, USA.
42. Department of Data Science, University of Mississippi Medical Center, Jackson, MS, USA.
43. Institut Pasteur, Université Paris Cité, Department of Computational Biology, F-75015 Paris, France.
44. Department of Epidemiology, Harvard TH School of Public Health, Boston, MA, 2115, USA.
45. Jackson Heart Study, University of Mississippi Medical Center, Jackson, MS, USA.
46. Division of Cardiology, Department of Medicine, Palo Alto VA Healthcare System, Palo Alta, CA, USA.
47. Falk Cardiovascular Research Center, Stanford University School of Medicine, Stanford, CA, USA.
48. School of Medicine and Public Health, University of Newcastle, New Lambton Heights, Australia.
49. Department of Internal Medicine (Geriatrics & Gerontology), Wake Forest University School of Medicine, Winston-Salem, NC, USA.

50. Department of Medicine, Baylor College of Medicine, Houston, Texas, USA.
51. Human Genome Sequencing Center, Baylor College of Medicine, Houston, Texas, USA.
52. Division of Aging, Brigham and Women's Hospital, Harvard Medical School, Boston, MA, USA.
53. Massachusetts Veterans Epidemiology Research and Information Center (MAVERIC), Veterans Affairs Boston Healthcare System, Boston, MA, USA.
54. Center for Biostatistics and Data Science, Institute for Informatics, Data Science, and Biostatistics, Washington University in St. Louis, School of Medicine, St. Louis, MO, 63110, USA.
55. Division of Epidemiology, Department of Medicine, Vanderbilt University Medical Center, Nashville, TN, 37203, USA.
56. Faculty of Population Health, Institute of Cardiovascular Science, University College London, London, WC1E 6BT, UK.
57. School of Public Health, The University of Texas Health Science Center at Houston (UTHealth), Brownsville, TX, USA.
58. Pulmonary, Critical Care and Sleep Medicine, Department of Medicine, University of Washington, Seattle, WA, USA.
59. Division of Quantitative Sciences, Department of Obstetrics and Gynecology, Vanderbilt University Medical Center, Nashville, TN, USA.
60. Department of Psychiatry and Psychotherapy, University Medicine Greifswald, Greifswald, Germany.
61. German Centre for Neurodegenerative Diseases, Site Rostock/Greifswald, Greifswald, Germany.
62. Institute of Biomedicine, School of Medicine, University of Eastern Finland, Kuopio, Finland.
63. Department of Epidemiology, UTHealth School of Public Health, Houston TX, USA.
64. Novo Nordisk Foundation Center for Basic Metabolic Research, Faculty of Health and Medical Sciences, University of Copenhagen, Copenhagen, Denmark.
65. Novo Nordisk Foundation Center for Genomic Mechanisms of Disease, Broad Institute of MIT and Harvard, Cambridge, MA, 2142, USA.
66. Veterans Affairs Atlanta Healthcare System, Decatur, Georgia, USA.
67. Nutrition Epidemiology and Data Science, Friedman School of Nutrition Science and Policy, Tufts University, Boston, MA, 2111, USA.

68. Programs in Metabolism and Medical & Population Genetics, The Broad Institute of MIT and Harvard, Cambridge, MA, USA.
69. Department of Medicine, Harvard Medical School, Boston, MA, USA.
70. Division of General Internal Medicine, Massachusetts General Hospital, 100 Cambridge St 16th Floor, Boston, MA, USA.
71. Department of Epidemiology, Colorado School of Public Health, University of Colorado Denver, Aurora, CO, USA.
72. Department of Genetics, University of North Carolina, Chapel Hill, NC, USA.
73. Center for Public Health Genomics, University of Virginia, Charlottesville, VA, USA.
74. Department of Public Health Sciences, University of Virginia, Charlottesville, VA, USA.
75. Department of Sleep Medicine, The University of Edinburgh, Edinburgh, UK.
76. Alzheimer Scotland, Dementia Research Centre, The University of Edinburgh, Edinburgh, UK.
77. Division of Psychiatry, Centre for Clinical Brain Sciences, The University of Edinburgh, Edinburgh, UK.
78. Department of Nutritional Sciences, School of Public Health, University of Michigan, Ann Arbor, MI, USA.
79. Cardiovascular Health Research Unit, Department of Medicine, University of Washington, Seattle, WA, USA.
80. CardioVascular Institute (CVI), Beth Israel Deaconness Medical Center, Boston, MA, USA.
81. Division of Genomic Outcomes, Department of Pediatrics, The Lundquist Institute for Biomedical Innovation at Harbor-UCLA Medical Center, Torrance, CA, USA.
82. Department of Biomedical Sciences, Universitas Padjadjaran, Bandung, Indonesia.
83. Laboratory Medicine and Pathology, University of Minnesota, Minneapolis, MN, USA.
84. Institute for Community Medicine, University Medicine Greifswald, Greifswald, Germany.
85. Department of Medicine, Clinical and Translational Epidemiology Unit, Mongan Institute, Massachusetts General Hospital, Boston, MA, USA.
86. Department of Population and Quantitative Health Sciences, School of Medicine, Case Western Reserve University, Cleveland, Ohio, 44106, USA.

87. Department of Medicine, University of Mississippi Medical Center, Jackson, MS, USA.
88. Department of Epidemiology, University of North Carolina at Chapel Hill, Chapel Hill, NC, USA.
89. Department of Clinical Physiology and Nuclear Medicine, Kuopio University Hospital, Kuopio, Finland.
90. Massachusetts General Hospital, Clinical and Translational Epidemiology Unit, Department of Medicine, Massachusetts General Hospital, Boston, MA, 02114, USA.
91. Metabolism Program, Broad Institute of MIT and Harvard, Cambridge, MA, 02142, USA.
92. Institute of Clinical Chemistry and Laboratory Medicine, University Medicine Greifswald, Greifswald, Germany.
93. Department of Epidemiology, University of Washington, Seattle, WA, USA.
94. Division of Public Health Sciences, Wake Forest University School of Medicine, Winston-Salem, NC, USA.
95. Department of Internal Medicine, Division of Endocrinology, Leiden University Medical Center, Leiden, the Netherlands.
96. Roden, the Netherlands.
97. Division of Cardiovascular Science, Epidemiology Branch, NHLBI, NIH, Bethesda, Maryland, 20817, USA.
98. William Harvey Research Institute, Faculty of Medicine and Dentistry, Queen Mary University of London, London, UK.
99. National Institute of Health and Care Research Barts Biomedical Research Centre, Queen Mary University of London, London, UK.
100. Center for Public Health Genomics, Department of Public Health Sciences, University of Virginia, Charlottesville, VA, 22908, USA.
101. Department of Biochemistry and Molecular Genetics, University of Virginia, Charlottesville, VA, 22908, USA.
102. Department of Genetic Epidemiology, University of Regensburg, Regensburg, Germany.

**Address of Correspondence**

Raymond Noordam PhD

Department of Internal Medicine, Section of Gerontology and Geriatrics,

Leiden University Medical Center,

Leiden, the Netherlands

Email: [r.noordam@lumc.nl](mailto:r.noordam@lumc.nl)

Tel: +31 71 526 6640



**Abstract (250 words maximum, unstructured)**

We performed large-scale genome-wide gene-sleep interaction analyses of lipid levels to identify novel genetic variants underpinning the biomolecular pathways of sleep-associated lipid disturbances and to suggest possible druggable targets. We collected data from 55 cohorts with a combined sample size of 732,564 participants (87% European ancestry) with data on lipid traits (high-density lipoprotein [HDL-c] and low-density lipoprotein [LDL-c] cholesterol and triglycerides [TG]). Short (STST) and long (LTST) total sleep time were defined by the extreme 20% of the age- and sex-standardized values within each cohort. Based on cohort-level summary statistics data, we performed meta-analyses for the one-degree of freedom tests of interaction and two-degree of freedom joint tests of the main and interaction effect. In the cross-population meta-analyses, the one-degree of freedom variant-sleep interaction test identified 10 loci ( $P_{\text{int}} < 5.0 \times 10^{-9}$ ) not previously observed for lipids. Of interest, the *ASPH* locus (TG, LTST) is a target for aspartic and succinic acid metabolism previously shown to improve sleep and cardiovascular risk. The two-degree of freedom analyses identified an additional 7 loci that showed evidence for variant-sleep interaction ( $P_{\text{joint}} < 5.0 \times 10^{-9}$  in combination with  $P_{\text{int}} < 6.6 \times 10^{-6}$ ). Of these, the *SLC8A1* locus (TG, STST) has been considered a potential treatment target for reduction of ischemic damage after acute myocardial infarction. Collectively, the 17 (9 with STST; 8 with LTST) loci identified in this large-scale initiative provides evidence into the biomolecular mechanisms underpinning sleep-duration-associated changes in lipid levels. The identified druggable targets may contribute to the development of novel therapies for dyslipidemia in people with sleep disturbances.

## Introduction

Low levels of high-density lipoprotein cholesterol (HDL-c), and high levels of low-density lipoprotein cholesterol (LDL-c) and triglycerides (TG) are well-characterized risk factors for atherosclerotic cardiovascular disease<sup>1-4</sup>. High LDL-c and TG concentrations have also been shown to causally impact atherosclerotic cardiovascular disease development<sup>5;6</sup>. Serum lipid levels are influenced by both environmental and genetic factors<sup>7</sup>, and large-scale efforts have identified hundreds of loci associated with increased lipid levels<sup>8-15</sup>.

Sleep disturbances are increasingly recognized as important modifiable risk factors for various metabolic diseases including atherosclerotic cardiovascular disease and type 2 diabetes<sup>16;17</sup>. In 2022, sleep duration was added to the Life's Essentials by the American Heart Association, highlighting the recognition of sleep duration as being important in cardiovascular prevention<sup>18</sup>. Both short and long self-reported habitual sleep duration have been associated with adverse (atherogenic) lipid profiles in epidemiological cohort studies<sup>19-23</sup>, and recent Mendelian Randomization studies suggest that both short and long habitual sleep durations as potential causal risk factors for atherogenic cardiovascular disease<sup>24-26</sup>. However, despite these findings, the biomolecular mechanisms underpinning sleep-associated atherogenic cardiovascular disease risk are still poorly understood. Examining gene-lifestyle interactions can be an important tool to identify additional genetic variants associated with the trait of interest as well as provide insights into the biomolecular mechanisms underpinning the trait-outcome association<sup>27;28</sup>. In previously conducted gene-lifestyle interaction projects performed within the Cohort for Heart and Aging Research in Genomic Epidemiology (CHARGE) consortium<sup>29;30</sup> Gene-Lifestyle Working Group<sup>27</sup>, we identified multiple loci interacting with lifestyle exposures to lipid levels<sup>31-34</sup>. In particular, we performed a meta-analysis of 126,926 individuals (predominantly European-ancestry; 20% of the participants defined as having either short or long sleep duration), which identified multiple loci associated with lipid profiles in the context of short and long sleep duration. Our results suggested that the effect of long sleep duration and short sleep duration may modify lipid profiles through distinct biological pathways<sup>31</sup>.

In recent years, more data has become available from large biobank initiatives (i.e., UK Biobank and the Million Veteran Program<sup>35;36</sup>). These data provide an opportunity to increase the sample size substantially in a more diverse study population to allow improved statistical power for the detection of additional gene-by-sleep duration interactions on serum lipid levels. Ultimately, such efforts can improve our understanding of the biomolecular mechanisms underpinning sleep-associated lipid disturbances. Here, we conducted a new and

updated multi-population sleep duration-by-gene interaction study on lipid profiles in 732,564 participants from five population groups (African [AFR], East Asian [EAS], European [EUR], Hispanic/Latino [HIS] and South Asian [SAS]).

## Methods

### *Overall study design*

The study was designed to include cohorts that collected questionnaire-based data on habitual total sleep time and measured blood lipids levels (TG, LDL-c and/or HDL-c). Genome-wide gene×sleep interaction analyses were performed separately by each participating study (and separately for each population group: (AFR, EAS, EUR, HIS, and SAS) following a standardized analysis protocol. Participants 18 years and older were included if they reported a total sleep time between 3 and 14 hours. For studies having habitual total sleep time and lipid levels collected at multiple rounds of visits, the visit with the largest sample size was selected for analysis. Statistical analyses were performed for men and women combined as well as separately for men and women to observe potential effect modification of the variant-sleep interaction effect by sex. Data were subsequently aggregated centrally for quality control and meta-analyses. When applicable, the analysis protocol was reviewed and approved by institutional review boards. Each contributing study was approved by local medical ethics committees and each participant provided written informed consent, in line with the declaration of Helsinki. More information on the individual cohorts is presented in the **Online Supplement**.

### *Harmonization of Exposure Variables*

Data on habitual total sleep time were collected through questionnaires using questions like “On an average day, how long do you sleep?” to calculate short total sleep time (STST) and long total sleep time (LTST). STST and LTST were derived by regressing sleep time on age, sex, and age×sex, or as indicated otherwise (**Table S2**). The derived residuals’ 20<sup>th</sup> and 80<sup>th</sup> percentiles were used as cutoffs: STST=1 if  $\leq 20^{\text{th}}$  percentile (otherwise “0”); LTST=1 if  $\geq 80^{\text{th}}$  percentile (otherwise “0”).

### *Harmonization of Outcome Variables*

We considered 3 lipid traits as outcome variables: LDL-c, HDL-c and TG. For most cohorts, fasting ( $\geq 8$  hours) LDL-c and TG were used. In UK Biobank (N = 359,962 for the combined sample; 49.1% of the total sample) participants were not asked to fast prior to blood samples, and therefore the vast majority ( $>90\%$ ) had no  $\geq 8$  hours fasting time. For LDL-c and TG, analyses in UK Biobank were done separately for those meeting the fasting criteria and those who did not, and considered as separate cohorts in subsequent meta-analyses. LDL-c was

either directly assayed or derived using the Friedewald equation (the latter restricted to those with  $TG \leq 400$  mg/dL)<sup>37</sup>. LDL-c was corrected for the use of lipid-lowering drugs, defined as any use of a statin drug or any unspecified lipid-lowering drug after the year 1994 (when statin use became common in general clinical practice). If LDL-c was directly assayed, the concentration of LDL-c was corrected by dividing the LDL-c concentration by 0.7. Otherwise (i.e. if LDL-c was derived using the Friedewald equation), then we first divided the concentration of total cholesterol by 0.8 before LDL-c calculation. Due to the skewed distribution of HDL-c and TG, we natural log-transformed the concentration prior to the analyses. No transformation for LDL-c was required. All lipid levels were winsorized at 6 standard deviations from the (transformed, if applicable) mean.

### *Individual cohort data analyses*

Genotype data were restricted to autosomal chromosomes, imputation quality  $R^2 \geq 0.3$  and minor allele frequency (MAF)  $\geq 0.05\%$  (**Table S1**). After data harmonization, each population-group specific cohort ran 2 regression models for 18 phenotype-exposure-sex combinations (3 phenotypes x 2 exposures x All/Men/Women). Below E denotes the sleep exposure (STST or LTST), Y denotes the lipid trait (LDL-c, HDL-c, TG), and C denotes the vector of covariates mentioned above specific to E. Analyses were preferably conducted by each cohort using either of the three software : LinGxEScanR v1.0 (<https://github.com/USCbiostats/LinGxEScanR>), GEM v1.4.1 (<https://github.com/large-scale-gxe-methods/GEM>), or MMAP (<https://github.com/MMAP/MMAP.github.io>) with robust standard errors (SEs) enforced<sup>38</sup> (**Table S1**). In cohorts with related participants, null model residuals (regressing lipid traits on a kinship matrix/genetic covariance matrix) were formulated as the lipid outcome.

The two regression models performed included one-degree of freedom (df) tests for examining the variant-sleep interaction effects, and the two-df-joint test that simultaneously assesses the variant-main and variant-sleep interaction effects<sup>39</sup>. Covariates included population specific principal components of the genotype matrix, cohort-specific confounders (e.g., study center), age, age<sup>2</sup>, sex, age×S/LTST, age<sup>2</sup>×S/LTST, and sex×S/LTST. Finally, for a fair comparison of our results with the previous work (e.g., standard genome-wide association model for comparison<sup>15</sup>), we also conducted a standard marginal genetic effect model without the consideration of STST or LTST within the same study sample.

### ***Centralized cohort-level and meta-level quality control***

Cohort-level summary statistics were processed centrally. For quality control (QC), we used the EasyQC2 software ([www.genepi-regensburg.de/easyqc2](http://www.genepi-regensburg.de/easyqc2)) package in R<sup>40</sup>. Data were filtered for degrees of freedom  $\geq 20$  calculated as minor allele count  $\times$  imputation quality within the unexposed, the exposed, and the total sample. When required, hg37 genomic coordinates were lifted over to hg38 genomic coordinates. Allele frequency discrepancies relative to population-matched TOPMed-imputed 1000G reference panels (Trans-Omics for Precision Medicine imputed 1000Genomes) were assessed, along with genomic control (GC) lambda inflation. Next, meta-level quality control was conducted within population groups (AFR: 13 cohorts, EAS: 5 cohorts, EUR: 30 cohorts, HIS: 7 cohorts, SAS: 1 cohort), with the evaluation of the improper transformation of the outcome variables, unstable numerical computation, or alarming inflation.

### ***Meta-analyses***

Meta-analyses were performed for each population group separately and further combined in a cross-population meta-analyses (CPMA). This resulted in a total of 18 meta-analyses per combination of sleep exposure and lipid trait: five population groups (EUR, HIS, EAS, AFR, SAS) and CPMA, and 3 sex groups (all, women, men). Four tests were considered: the marginal genetic effect ( $B_{M2\_G}$ ), the main genetic effect from the interaction model ( $B_{M1\_G}$ ), the interaction effect ( $B_{M1\_G \times E}$ ), and the joint main and interaction effects ( $B_{M1\_G, G \times E}$ ) with cohort-level GC correction to correct for possible inflation<sup>41</sup>. METAL software for meta-analysis with inverse-variance weights<sup>28</sup> was used to combine evidence across studies for each of the four tests. CPMA was subsequently executed on the resultant population-specific METAL output results, with population-level GC correction. Due to the low numbers of participants contributing to the HIS, EAS and SAS analyses, these population-specific results were not interpreted separately, but only as a part of the CPMA. Furthermore, we only considered variants analyzed in at least 40,000 participants in the main analysis for discovery.

### ***Identification of independent genomic loci***

We used EasyStrata2 software in R to prioritize top loci from significant results identified in the one-df interaction and two-df joint tests<sup>42</sup>. We excluded variants within 1 Mb distance of the major histocompatibility complex (MHC) region. Significant variants were identified using the threshold criteria detailed below. (1) Variants with significant one-df interaction

effect ( $P_{\text{int}} < 5 \times 10^{-9}$ ,  $\text{FDR} < 0.05$ ) and (2) variants with significant two-df joint effect ( $P_{\text{joint}} < 5 \times 10^{-9}$  with  $\text{FDR} < 0.05$ ) were selected as top variants. To prioritize lead variants from the two-df joint analysis with evidence for having variant-sleep interaction, we evaluated the two-df joint lead variants for one-df interactions and used a Bonferroni correction for the number of two-df joint variants identified in the respective population-specific group (CPMA, EUR, AFR)<sup>43</sup>. Note that the two-df joint test and the one-df interaction effect tests are correlated, so the former procedure does not offer formal statistical evidence of interaction. Nevertheless, it provides a fast and easy prioritization of variants most likely to be involved in interaction with the sleep variables. All such variants were narrowed down to loci based on a 250 kb distance. Finally, within these regions, independent loci were identified by linkage disequilibrium (LD)  $r^2$  threshold  $< 0.1$  using TOPMed-imputed 1000G reference panels. If variants were missing in the LD panels, then the most significant variant within each 500kb region was retained. From the lead variants identified, we additionally extracted the variant information from the sex-stratified analyses to test for heterogeneity of the interaction effects by sex. The heterogeneity of the variant-sleep interaction effect between men and women was tested by performing two-sample Z-tests assuming independence, which were conducted for each interaction loci in the meta-analysis of men and women combined<sup>44</sup>.

### ***Gene mapping, functional annotation, and follow-up phenotypic annotations***

For the lead variants identified, variant mapping was primarily performed using Functional Mapping and Annotation of Genome-wide Association Studies v1.6.0 (FUMA)<sup>45</sup>, and Locuszoom (<https://my.locuszoom.org>)<sup>46; 47</sup>. At the genomic region level, FUMA's SNP2GENE pipeline was used to annotate a comprehensive list of genes for each top locus, incorporating genomic position, chromatin interaction ( $\text{FDR} \leq 1 \times 10^{-6}$ , 250bp upstream - 500 bp downstream of the transcription startsite [TSS]), and GTEXv8 eQTL evidence with the top variant or its variants in LD ( $r^2 > 0.1$  within 500kb)<sup>45; 48</sup>. At the variant level, PheWeb and Open Target Genetics were queried for significant trait associations ( $p < 5 \times 10^{-8}$ ) from past GWAS analyses<sup>49; 50</sup>. At the gene level, we explored the International Mouse Phenotyping Consortium release 19.1 (IMPC), Online Mendelian Inheritance in Man (OMIM; <https://omim.org/>), PheWeb, Phenotype-Genotype Integrator (PheGenI), Open Target Genetics, and the online drugbank for retrieving information on the genes as potential drug targets (<https://go.drugbank.com>)<sup>49-52</sup>. All identified mapped protein-coding genes were then

queried using FUMA's GENE2FUNC pipeline to identify significant (adjusted p-value<0.05) pathways and traits<sup>45</sup>.

### **Druggability analysis**

We investigated the potential druggability of the sleep duration-lipid trait candidate interacting gene targets as previously described<sup>53</sup>. In short, we first used the Drug-Gene Interaction database (DGIdb; v4.2.0) to query high or medium priority sleep-lipid interacting genes to determine the potential druggability of the candidate gene targets. We annotated genes for implicated pathways and functions using the Kyoto Encyclopedia of Genes and Genomes (KEGG) database. We annotated the druggability target categories and queried all interacting drugs reported in 43 databases (BaderLabGenes, CarisMolecularIntelligence, dGene, FoundationOneGenes, GO, HingoraniCasas, HopkinsGroom, HumanProteinAtlas, IDG, MskImpact, Oncomine, Pharos, RussLampel, Tempus, CGI, CIViC, COSMIC, CancerCommons, ChEMBLDrugs, ChEMBLInteractions, ClarityFoundationBiomarkers, ClarityFoundationClinicalTrial, DTC, DoCM, DrugBank, Ensembl, Entrez, FDA, GuideToPharmacology, JACX-CKB, MyCancerGenome, MyCancerGenomeClinicalTrial, NCI, OncoKB, PharmGKB, TALC, TEND, TTD, TdgClinicalTrial, Wikidata). We queried protein targets for available active ligands in ChEMBL. We queried gene targets in the druggable genome using the most recent druggable genome list established from the NIH Illuminating the Druggable Genome Project (<https://github.com/druggablegenome/IDGTargets>) available through the Pharos web platform (<https://pharos.nih.gov/targets>). We also queried FDA-approved drugs, late-stage clinical trials and disease indications in the DrugBank, ChEMBL, and ClinicalTrials.gov databases. We provided results for the top MESH and DrugBank indications and clinical trials.



## Results

### *Study overview*

Data from 55 cohorts including five population groups were included: AFR (13 cohorts, N=48,851 [7%]), EAS (4 cohorts, N=8,097 [1%]), EUR (30 cohorts, N=637,166 [87%]), HIS (7 cohorts, N=32,508 [4%]), and SAS (1 cohort, N=7,619 [1%]). The total sample size was 732,564 participants in the CPMA with 149,210 participants with STST and 147,603 participants with LTST. Additional information on the characteristics of each of study sample is presented in **Tables S1-3**.

### *Findings from the one-df variant-sleep interaction analyses*

One-df interaction CPMA identified 9 loci displaying evidence for genetic associations with the lipid traits modified by either STST or LTST ( $P_{\text{int}} < 5 \times 10^{-9}$  in combination with an FDR  $< 0.05$ ) (**Figure 1; Table 1; Figures S1-3** for  $-\log(P_{\text{int}})$  and QQ plots). Of these, we identified 4 variants for TG, 2 variants for LDL-c and 3 variants for HDL-c. These variants have not been observed before in studies on lipid levels (i.e.,<sup>15</sup>) nor did we find evidence of potential variant main effects in the same study sample (**Table S4**). Of the lead variants identified, the 13:50374420:C\_T locus (rs14172636; Minor Allele Frequency [MAF] = 0.0087), mapped to the *DLEU1* gene, interacted with STST in its association with both TG ( $P_{\text{int}} = 2.40 \times 10^{-16}$ ) and HDL-c ( $P_{\text{int}} = 4.10 \times 10^{-12}$ ). To illustrate, among those reporting STST, the rs14172636-C allele was associated with 0.26 units lower log-transformed TG (equivalent to an approximate additive decrease of 22.9%) and 0.132 units higher log-transformed HDL-c (equivalent to an approximate additive increase of 14.1%) compared to those without STST. We did not find evidence for a 1-df rs14172636 interaction effect on LDL-c ( $P_{\text{int}} = 0.07$ ). The 8:61617696:C\_T locus (rs147261056; MAF: 0.0048), mapped to *ASPH* and *CLVS1*, interacted with LTST in its association with TG ( $P_{\text{int}} = 2.78 \times 10^{-13}$ ). The 11:10411707:C\_CT locus (rs1847639939; MAF: 0.46), mapped to the *AMPD3* gene, interacted with LTST in its association with LDL-c ( $P_{\text{int}} = 4.72 \times 10^{-9}$ ). Other variants identified in the CPMA included 3:162278901A\_T (rs162278901; *OTOL1*, LDL-c with LTST;  $P_{\text{int}} = 2.78 \times 10^{-13}$ ), 7:72156448:A\_G (rs573762901; *CALNI*, HDL with LTST;  $P_{\text{int}} = 1.43 \times 10^{-10}$ ), 2:186808058:G\_T (rs6760240; *ZSWIM2*, TG with STST;  $P_{\text{int}} = 1.47 \times 10^{-9}$ ), 7:102460277:G\_T (rs543672875; *ALKBH4*, HDL-c with STST;  $P_{\text{int}} = 1.51 \times 10^{-9}$ ) and 2:184828292:C\_T (rs190975828; *ZNF804A*, LDL-c with LTST;  $P_{\text{int}} = 4.72 \times 10^{-9}$ ).

One additional variant was identified in the EUR meta-analysis only. The variant 4:12768773:C\_G (rs192018195;  $P_{\text{int}} = 4.81 \times 10^{-11}$ , MAF = 0.0151) mapping to

*INTU/SLC25A31/HSPA4L* was identified in the STST analysis on TG, and was just outside the significance boundaries in the CPMA ( $P_{\text{int}} = 5.03 \times 10^{-9}$ ). Some of the more rare variants identified in these efforts were unable to be investigated further in the population-specific subgroup analyses as variants did not pass post-meta-analysis QC (**Figure 2**). Of the remaining variants, we only found evidence that 11:10411707:C\_CT (rs1847639939) was associated with LDL-c in the EUR sample ( $P_{\text{int}} = 1.61 \times 10^{-8}$ ), and not in the AFR meta-analysis ( $P_{\text{int}} = 0.74$ ) (**Figure 2**).

An extensive summary of the primary results, including reporting of the results in the sex-specific and population-specific analyses when passing post meta-analysis QC, are presented in **Table S4**; additional information on the region of the identified variants is presented in regional plots presented in **Figure S4**. With the exception of the lead variants mapped to *ASPH* and *DLEUI*, none were noncoding. No additional variants were identified in the sex-stratified analyses nor did we observe evidence for sex differences ( $P_{\text{sex-int}} > 0.05$ ) for variants identified with the one-df interaction test.

#### ***Loci identified through the two-df variant-sleep interaction meta-analyses***

Additional analyses were performed to prioritize potential variant-sleep interactions identified by the two-df joint main and interaction effect meta-analyses. In the two-df CPMA (**Table S4 and 5; Figure S5**), we identified ( $P_{2\text{df}} < 5 \times 10^{-9}$  and  $\text{FDR} < 0.05$ ) a total of 1,190 lead variants for the TG-LTST analysis (covering 371 genomic regions), 1,156 lead variants for the TG-STST analysis (covering 312 genomic regions), 1,185 lead variants for the HDL-c-LTST analyses (covering 362 genomic regions), 1,178 lead variants for the HDL-c-STST analyses (covering 358 genomic regions), 1,433 lead variants for the LDL-c-LTST analyses (covering 264 genomic regions), and 1,431 lead variants for the LDL-c-STST analyses.

These lead variants were then tested for one-df interaction. Here, we used a less stringent  $P$ -value cut off for one-df interactions based on the total number of lead variants identified in the CPMA sample for the three traits and two exposure groups combined ( $P_{\text{int}} < 6.60 \times 10^{-6} = 0.05/7,573$ , Bonferroni-corrected, see **Methods**). Through this process we identified seven additional genetic lead variants showing evidence for one-df interaction (**Table 2**); of these, five variants were identified for TG (one with LTST, four for STST), one variant for HDL-c (for LTST), and one variant for LDL-c (for LTST) not previously identified for lipid levels nor associated with the lipid trait in the model when not incorporating sleep duration in the same study sample (**Table 2 and Table S4 and S5** and for detailed information). Regional plots of the one-df interaction results of these variants are

presented in **Supplementary Figure 8**. In particular, we identified 20:51830403:A\_G (rs150607032; *ATP9A/NFATC2/SALL4*, TG with STST,  $P_{\text{int}} = 3.59 \times 10^{-8}$ ), 11:13058160:C\_T (rs59374498; *TEAD1/RASSF10*, TG with LTST,  $P_{\text{int}} = 5.71 \times 10^{-8}$ ), 10:97769146:A\_G (rs191757273; *PYROXD2*, LDL-c with LTST,  $P_{\text{int}} = 7.41 \times 10^{-8}$ ), 21:35272725:A\_T (rs114083565; *RUNX1*, TG with STST,  $P_{\text{int}} = 8.40 \times 10^{-7}$ ), 18:55378517:A\_T (rs9949541; *TCF4*, HDL-c with LTST), 2:40094191:A\_T (rs34771893; *SLC8A1*, TG with STST,  $P_{\text{int}} = 4.12 \times 10^{-6}$ ), and 20:23353740:A\_G (rs73319497; *GZF1/NPAB/CASTL1/CAST11/NXT1*, TG with STST,  $P_{\text{int}} = 4.47 \times 10^{-6}$ ). No evidence was observed that the interaction terms differed for men and women (sex-difference  $P_{\text{sex-Int}} > 0.05$ ) (**Supplementary Table 4**). We identified no additional variants among the two-df joint findings showing evidence for one-df interaction ( $P_{\text{int}} > 1.10 \times 10^{-5}$  and  $> 1.36 \times 10^{-4}$ , respectively; **Table S6 and S7 and Figures S6 and S7**).

### ***Follow-up analyses***

Based on the findings identified in the TG-STST analyses (the lipid-sleep combination with most identified variants in the one-df and two-df interaction analyses), and using the GTEx v8 databases, we did not observe evidence for eQTLs enrichment in any particular tissue ( $P > 0.05$ ). Some evidence (p-value = 0.01) was found for enrichment of the Vitamin D receptor pathway (based on the *SLC8A1*, *NFATC2* and *SALL4* genes; based on Wikipathways using the GENE2FUNC in FUMA<sup>45</sup>) (**Figure S9**). No evidence for tissue and pathway enrichment was observed for the other loci identified in the exposure-trait combinations.

### ***Druggability analyses***

We first queried mapped gene targets from the different analyses using the Drug-Gene Interaction database (DGIdb), which identified seven genes annotated as clinically actionable or members of the druggable genome (**Table S8a**). Several of these gene targets are implicated in calcium signaling (*SLC25A31*, *SLC8A1*, *ASPH*), amino acid or purine metabolism (*PYROXD2*, *AMPD3*), and regulation of gene transcription (*TEAD1*, *NFATC2*, *RUNX1*). We identified seven gene targets of FDA-approved drugs evaluated in late-stage clinical trials using DrugBank and ClinicalTrials.gov databases (**Table S8b**). *SLC8A1* is a target of the nutraceutical icosapent (a modified version of omega-3 fatty acid ethyl eicosapentaenoic acid (EPA)), which is used to treat patients with hypertriglyceridemia. *SLC8A1* is also a target of the small molecule inhibitor caldaret, which was investigated for preventing acute myocardial infarction and treating patients with congestive heart failure.

*SLC8A1* is also a target of FDA-approved antiarrhythmic dronedarone to treat patients with atrial fibrillation or atrial flutter. We also identified *SLC25A31*, *ASPH*, and *PYROXD2* as targets of commonly prescribed drugs: beta-blocker metoprolol, anticoagulant warfarin, and the attention deficit hyperactivity disorder (ADHD) drug methylphenidate, respectively, all drugs with indications that are frequently observed in people with sleep disorders<sup>54-56</sup>.

## Discussion

This large-scale effort identified several variant-lipid trait associations that were modified by either STST or LTST, without overlap, including 10 loci previously-unidentified in relation to lipid levels that interact with either STST or LTST to blood lipid levels. Using joint meta-analyses, in which the main effect of the variant and the variant-sleep interaction effects are tested jointly, 7 additional genetic lead variants were identified that also showed evidence for interaction with STST or LTST. One of the variants mapped to *DLEUI* and was identified for 2 traits (HDL-c and TG). Moreover, we found distinct variants for STST and LTST interactions— a pattern we also previously reported in a smaller sample for generally higher frequency alleles— suggesting that short and long sleep duration affect the lipid traits through distinct biomolecular mechanisms. Some of the identified genes (most notably *SLC8A1*, *SLC25A31* and *ASPH*) were previously identified as targets for the prevention or treatment of cardiovascular disease and, therefore show promise as future targets for further validation and clinical translation.

The variants identified in the present study have not been associated previously with sleep duration<sup>57</sup>, other sleep phenotypes (i.e., chronotype, insomnia symptoms or daytime napping)<sup>58-60</sup>, or the blood lipid levels that were considered in the present study<sup>15</sup>. The majority of the previously unreported findings in this study are low-frequency variants, with the notable exception of 11:10411707C\_CT (rs1847639939), that were unlikely to be found in previous studies because they were either not included in the used imputation panels or there was insufficient power. Of the variants identified in the one-df interaction analyses, only the lead variants identified mapped to *ASPH* and *DLEUI* were upstream/downstream transcript variants; all other variants were intronic variants. These findings support the importance of gene-phenotype interaction testing in large studies to explore mechanisms and potential health preventive targets.

A number of the variants identified in the present effort are supported by biological follow-up analyses. Interestingly, we identified *DLEUI* (Deleted In Lymphocytic Leukemia 1), a gene originally identified as a possible tumour suppressor gene and often deleted in patients with B-cell chronic lymphocytic leukemia<sup>61</sup>, in both the variant-STST analyses on HDL-c and TG (and not LDL-c). Previously, genome-wide association studies have also increasingly identified this gene with, amongst others, lipid levels<sup>62</sup>, fatty acid<sup>63</sup>, anthropometrics<sup>64; 65</sup>, immune markers<sup>66</sup>, and blood pressure<sup>67</sup>. Furthermore, epigenetic changes in peripheral blood in this gene have been identified in acute myocardial infarction<sup>68</sup>. Although *DLEUI* has not been identified with the habitual sleep variables<sup>57-59; 69</sup>, *DLEUI* has

been identified to sleep apnea, which is often associated with poor sleep quality and altered sleep duration<sup>70</sup>. We found that the rs14172636 C-allele in *DLEU1* was associated with lower TG and higher HDL-c in individuals reporting short sleep duration, indicative of a lower atherogenic profile. Whether short sleep duration is protective of *DLEU1*-related dyslipidemia, or this variant modifies adverse effects of short sleep duration on lipid levels, cannot be sorted out. The *ASPH* gene was found to be a target for the supplemental Aspartic acid and Succinic acid. Succinate metabolism has been hypothesized as a novel target for myocardial reperfusion injury<sup>71</sup>, and elevated plasma succinate levels have been associated with higher levels of cardiovascular risk factors<sup>72</sup>.

Our druggability analysis results suggest there are potential drug repurposing opportunities to intervene in common signaling and metabolic pathways implicated in sleep behaviour and lipid metabolism, which could help attenuate serious cardiovascular complications in high-risk patients. One of our top plausible gene targets identified in the 2-degree interaction analyses, *SLC8A1*, is targeted by nutraceutical icosapent. Furthermore, *SLC8A1* has previously been described as a target for the investigational drug caldaret. Caldaret, which acts as a cardioprotective drug modulating intracellular calcium levels, has been previously investigated to reduce infarct sizes in patients with acute myocardial infarction, although did not show positive results<sup>73; 74</sup>. Of interest, *SLC8A1* is affected by the renin angiotensin system<sup>75</sup>, which is altered by different sleep conditions<sup>76; 77</sup>. These might present an effective strategy to reduce elevated triglycerides in patients with short sleep duration at risk for cardiovascular complications (e.g., acute myocardial infarction or atrial fibrillation). We also identified several FDA-approved compounds with decades of safe use, which could be evaluated in future preclinical or clinical studies. It is also worth noting the limitations of these predicted drug interactions, which could potentially reflect medication side effects on sleep duration and lipid traits and thus should be interpreted with caution.

We found preliminary evidence for the involvement of the Vitamin D receptor pathway in the association between STST and TG. Although vitamin D itself has not been shown to play any significant role in the onset of cardiovascular disease based on data from randomized clinical trials and Mendelian randomization<sup>78; 79</sup>, the vitamin D receptor appears to be involved in lipid metabolism<sup>80</sup>. Furthermore, genetic variation in the vitamin D receptor gene (*VDR*) has been associated with cardiovascular disease<sup>81</sup>. Accelerated atherosclerosis was observed in *VDR* knock-out mice<sup>82</sup>, suggesting that vitamin D receptor signaling inhibits atherosclerosis development. Finally, vitamin D levels have been reported to vary with various sleep outcomes<sup>83</sup>, and vitamin D supplementation has been hypothesized to improve

sleep<sup>84</sup>. Nevertheless, the role of the vitamin D receptor in the association between sleep and lipid disturbances should be explored in greater detail.

The present study used the largest study sample possible, by considering as many cohorts as possible with available data on genomics, self-reported sleep duration, and concurrent lipid levels. Furthermore, we attempted to standardize the self-reported dichotomous sleep-exposure variables as much as possible by first taking the age- and sex-adjusted residuals of total sleep time. Despite our efforts to increase sample size in combination with increased ancestry diversity compared with our previous effort<sup>31</sup>, the vast majority of our study still consisted of cohorts with mainly EUR participants. It is very likely that population-specific variant-sleep interactions were missed in the meta-analyses of the non-European populations due to a lack of sufficient statistical power; furthermore, because of low statistical power, we did not present the results from the Hispanic and Asian specific meta-analyses. Future efforts in non-European cohorts, when more data become available, should be further expanded. Although some of the identified loci, despite having low allele frequencies, had some evidence of biological plausibility, they should be further explored in independent samples as we did not have the power to separate cohorts into discovery and independent replication analyses. The present study used information on habitual sleep duration collected through self-report, which may have measurement error, possibly resulting in lower statistical power. Note that phenotypic and genetic correlations between sleep duration assessed through questionnaire and accelerometry are low to modest at most<sup>57; 69; 85</sup>, which suggests phenotypes derived by these methodologies reflect different sleep aspects. Finally, the present study considered sleep as a single dimension, whereas sleep is largely acknowledged to be highly dimensional and complex<sup>86</sup>. Indeed, joint associations between sleep duration and sleep quality have been observed in relation to atherosclerotic cardiovascular disease<sup>26; 87; 88</sup>. However, detailed data on sleep quality measures were not available in many cohorts, nor was it possible to harmonize these measures when available. Identified variants should, therefore, also be explored in independent samples, as they become available with other sleep variables.

In summary, the present study identified several novel genetic loci associated with lipid traits that were modified by self-reported short- and long total sleep time. The findings yield new insights into the biology underpinning the observed (causal) association between sleep duration and atherosclerotic cardiovascular disease. The observed targets for treatment yield insights into possible prevention of atherosclerotic cardiovascular disease in relation to

sleep duration. Additional functional follow-up is required to further characterize the identified genetic variants and to translate the findings to more biological and clinical context.

### **ACKNOWLEDGMENTS**

This project was largely supported by two grants from the U.S. National Heart, Lung, and Blood Institute (NHLBI), the National Institutes of Health, R01HL118305 and R01HL156991. Furthermore, RN and DvH were supported by a grant from the Dutch Research Council (NWO, Dutch National Research Agenda, Research along routes by consortia, 2021–2026, BioClock: the circadian clock in modern society). This research was supported in part by the Intramural Research Program of the National Human Genome Research Institute in the Center for Research on Genomics and Global Health (CRGGH—Z01HG200362). HW and PN were supported by R01HL153814 and R21HL165324. CRGGH is also supported by the National Institute of Diabetes and Digestive and Kidney Diseases (NIDDK), the Center for Information Technology, and the Office of the Director at the National Institutes of Health. DAL and QY contributions were supported by the British Heart Foundation (CH/F/20/90003) and UK Medical Research Council (MC\_UU\_00032/05). TOK was supported by grants from the Novo Nordisk Foundation (NNF18CC0034900, NNF21SA0072102, NNF22OC0074128, NNF23SA0084103). PBM acknowledges support from the National Institute for Health and Care Research (NIHR) Biomedical Research Centre at Barts (NIHR202330). WJG and JM were supported by PO1CA196569. Study-specific funding information is provided in the online supplement.

### **Declaration of interests**

HJG has received travel grants and speakers honoraria from Neuraxpharm, Servier, Indorsia and Janssen Cilag. LMR is a consultant for the TOPMed Administrative Coordinating Center (through Westat). TDS is co-founder and shareholder of ZOE Ltd. All other co-authors declare to have no conflicts of interest.



## Reference

1. Barter, P., Gotto, A.M., LaRosa, J.C., Maroni, J., Szarek, M., Grundy, S.M., Kastelein, J.J., Bittner, V., and Fruchart, J.C. (2007). HDL cholesterol, very low levels of LDL cholesterol, and cardiovascular events. *N Engl J Med* 357, 1301-1310.
2. Nordestgaard, B.G., and Varbo, A. (2014). Triglycerides and cardiovascular disease. *Lancet* 384, 626-635.
3. Rader, D.J., and Hovingh, G.K. (2014). HDL and cardiovascular disease. *Lancet* 384, 618-625.
4. Ridker, P.M. (2014). LDL cholesterol: controversies and future therapeutic directions. *Lancet* 384, 607-617.
5. Holmes, M.V., Asselbergs, F.W., Palmer, T.M., Drenos, F., Lanktree, M.B., Nelson, C.P., Dale, C.E., Padmanabhan, S., Finan, C., Swerdlow, D.I., et al. (2015). Mendelian randomization of blood lipids for coronary heart disease. *Eur Heart J* 36, 539-550.
6. Voight, B.F., Peloso, G.M., Orho-Melander, M., Frikke-Schmidt, R., Barbalic, M., Jensen, M.K., Hindy, G., Holm, H., Ding, E.L., Johnson, T., et al. (2012). Plasma HDL cholesterol and risk of myocardial infarction: a mendelian randomisation study. *Lancet* 380, 572-580.
7. Zheng, Y., and Qi, L. (2014). Diet and lifestyle interventions on lipids: combination with genomics and metabolomics. *Clinical Lipidology* 9, 417-427.
8. Klarin, D., Damrauer, S.M., Cho, K., Sun, Y.V., Teslovich, T.M., Honerlaw, J., Gagnon, D.R., DuVall, S.L., Li, J., Peloso, G.M., et al. (2018). Genetics of blood lipids among ~300,000 multi-ethnic participants of the Million Veteran Program. *Nat Genet* 50, 1514-1523.
9. Liu, D.J., Peloso, G.M., Yu, H., Butterworth, A.S., Wang, X., Mahajan, A., Saleheen, D., Emdin, C., Alam, D., Alves, A.C., et al. (2017). Exome-wide association study of plasma lipids in >300,000 individuals. *Nat Genet* 49, 1758-1766.
10. Willer, C.J., Schmidt, E.M., Sengupta, S., Peloso, G.M., Gustafsson, S., Kanoni, S., Ganna, A., Chen, J., Buchkovich, M.L., Mora, S., et al. (2013). Discovery and refinement of loci associated with lipid levels. *Nat Genet* 45, 1274-1283.
11. Asselbergs, F.W., Guo, Y., van Iperen, E.P., Sivapalaratnam, S., Tragante, V., Lanktree, M.B., Lange, L.A., Almoguera, B., Appelman, Y.E., Barnard, J., et al. (2012). Large-scale gene-centric meta-analysis across 32 studies identifies multiple lipid loci. *Am J Hum Genet* 91, 823-838.

12. Teslovich, T.M., Musunuru, K., Smith, A.V., Edmondson, A.C., Stylianou, I.M., Koseki, M., Pirruccello, J.P., Ripatti, S., Chasman, D.I., Willer, C.J., et al. (2010). Biological, clinical and population relevance of 95 loci for blood lipids. *Nature* 466, 707-713.
13. Aulchenko, Y.S., Ripatti, S., Lindqvist, I., Boomsma, D., Heid, I.M., Pramstaller, P.P., Penninx, B.W., Janssens, A.C., Wilson, J.F., Spector, T., et al. (2009). Loci influencing lipid levels and coronary heart disease risk in 16 European population cohorts. *Nat Genet* 41, 47-55.
14. Kathiresan, S., Manning, A.K., Demissie, S., D'Agostino, R.B., Surti, A., Guiducci, C., Gianniny, L., Burt, N.P., Melander, O., Orho-Melander, M., et al. (2007). A genome-wide association study for blood lipid phenotypes in the Framingham Heart Study. *BMC Med Genet* 8 Suppl 1, S17.
15. Graham, S.E., Clarke, S.L., Wu, K.H., Kanoni, S., Zajac, G.J.M., Ramdas, S., Surakka, I., Ntalla, I., Vedantam, S., Winkler, T.W., et al. (2021). The power of genetic diversity in genome-wide association studies of lipids. *Nature* 600, 675-679.
16. Van Cauter, E., Spiegel, K., Tasali, E., and Leproult, R. (2008). Metabolic consequences of sleep and sleep loss. *Sleep Med* 9 Suppl 1, S23-28.
17. Wolk, R., Gami, A.S., Garcia-Touchard, A., and Somers, V.K. (2005). Sleep and cardiovascular disease. *Curr Probl Cardiol* 30, 625-662.
18. Lloyd-Jones, D.M., Allen, N.B., Anderson, C.A.M., Black, T., Brewer, L.C., Foraker, R.E., Grandner, M.A., Lavretsky, H., Perak, A.M., Sharma, G., et al. (2022). Life's Essential 8: Updating and Enhancing the American Heart Association's Construct of Cardiovascular Health: A Presidential Advisory From the American Heart Association. *Circulation* 146, e18-e43.
19. Song, Q., Liu, X., Zhou, W., Wu, S., and Wang, X. (2020). Night sleep duration and risk of each lipid profile abnormality in a Chinese population: a prospective cohort study. *Lipids Health Dis* 19, 185.
20. Abdurahman, A.A., Bule, M., Shab-Bidar, S., Rezaei, S., and Djafarian, K. (2020). The association between sleep duration and risk of abnormal lipid profile: A systematic review and meta-analysis. *Obesity Medicine* 18, 100236.
21. Smiley, A., King, D., Harezlak, J., Dinh, P., and Bidulescu, A. (2019). The association between sleep duration and lipid profiles: the NHANES 2013-2014. *J Diabetes Metab Disord* 18, 315-322.
22. Bos, M.M., Noordam, R., van den Berg, R., de Mutsert, R., Rosendaal, F.R., Blauw, G.J., Rensen, P.C.N., Biermasz, N.R., and van Heemst, D. (2019). Associations of sleep

- duration and quality with serum and hepatic lipids: The Netherlands Epidemiology of Obesity Study. *J Sleep Res* 28, e12776.
23. Bos, M.M., Goulding, N.J., Lee, M.A., Hofman, A., Bot, M., Pool, R., Vijfhuizen, L.S., Zhang, X., Li, C., Mustafa, R., et al. (2021). Investigating the relationships between unfavourable habitual sleep and metabolomic traits: evidence from multi-cohort multivariable regression and Mendelian randomization analyses. *BMC Med* 19, 69.
24. Daghlas, I., Dashti, H.S., Lane, J., Aragam, K.G., Rutter, M.K., Saxena, R., and Vetter, C. (2019). Sleep Duration and Myocardial Infarction. *J Am Coll Cardiol* 74, 1304-1314.
25. Ai, S., Zhang, J., Zhao, G., Wang, N., Li, G., So, H.C., Liu, Y., Chau, S.W., Chen, J., Tan, X., et al. (2021). Causal associations of short and long sleep durations with 12 cardiovascular diseases: linear and nonlinear Mendelian randomization analyses in UK Biobank. *Eur Heart J* 42, 3349-3357.
26. Goodman, M.O., Dashti, H.S., Lane, J.M., Windred, D.P., Burns, A., Jones, S.E., Sofer, T., Purcell, S.M., Zhu, X., Ollila, H.M., et al. (2023). Causal Association Between Subtypes of Excessive Daytime Sleepiness and Risk of Cardiovascular Diseases. *J Am Heart Assoc* 12, e030568.
27. Rao, D.C., Sung, Y.J., Winkler, T.W., Schwander, K., Borecki, I., Cupples, L.A., Gauderman, W.J., Rice, K., Munroe, P.B., Psaty, B.M., et al. (2017). Multiancestry Study of Gene-Lifestyle Interactions for Cardiovascular Traits in 610 475 Individuals From 124 Cohorts: Design and Rationale. *Circ Cardiovasc Genet* 10.
28. Manning, A.K., LaValley, M., Liu, C.T., Rice, K., An, P., Liu, Y., Miljkovic, I., Rasmussen-Torvik, L., Harris, T.B., Province, M.A., et al. (2011). Meta-analysis of gene-environment interaction: joint estimation of SNP and SNP x environment regression coefficients. *Genet Epidemiol* 35, 11-18.
29. Psaty, B.M., O'Donnell, C.J., Gudnason, V., Lunetta, K.L., Folsom, A.R., Rotter, J.I., Uitterlinden, A.G., Harris, T.B., Witteman, J.C., Boerwinkle, E., et al. (2009). Cohorts for Heart and Aging Research in Genomic Epidemiology (CHARGE) Consortium: Design of prospective meta-analyses of genome-wide association studies from 5 cohorts. *Circ Cardiovasc Genet* 2, 73-80.
30. Psaty, B.M., and Sitlani, C. (2013). The Cohorts for Heart and Aging Research in Genomic Epidemiology (CHARGE) Consortium as a model of collaborative science. *Epidemiology* 24, 346-348.
31. Noordam, R., Bos, M.M., Wang, H., Winkler, T.W., Bentley, A.R., Kilpelainen, T.O., de Vries, P.S., Sung, Y.J., Schwander, K., Cade, B.E., et al. (2019). Multi-ancestry sleep-

- by-SNP interaction analysis in 126,926 individuals reveals lipid loci stratified by sleep duration. *Nat Commun* 10, 5121.
32. de Vries, P.S., Brown, M.R., Bentley, A.R., Sung, Y.J., Winkler, T.W., Ntalla, I., Schwander, K., Kraja, A.T., Guo, X., Franceschini, N., et al. (2019). Multiancestry Genome-Wide Association Study of Lipid Levels Incorporating Gene-Alcohol Interactions. *Am J Epidemiol* 188, 1033-1054.
  33. Bentley, A.R., Sung, Y.J., Brown, M.R., Winkler, T.W., Kraja, A.T., Ntalla, I., Schwander, K., Chasman, D.I., Lim, E., Deng, X., et al. (2019). Multi-ancestry genome-wide gene-smoking interaction study of 387,272 individuals identifies new loci associated with serum lipids. *Nat Genet* 51, 636-648.
  34. Kilpelainen, T.O., Bentley, A.R., Noordam, R., Sung, Y.J., Schwander, K., Winkler, T.W., Jakupovic, H., Chasman, D.I., Manning, A., Ntalla, I., et al. (2019). Multi-ancestry study of blood lipid levels identifies four loci interacting with physical activity. *Nat Commun* 10, 376.
  35. Bycroft, C., Freeman, C., Petkova, D., Band, G., Elliott, L.T., Sharp, K., Motyer, A., Vukcevic, D., Delaneau, O., O'Connell, J., et al. (2018). The UK Biobank resource with deep phenotyping and genomic data. *Nature* 562, 203-209.
  36. Gaziano, J.M., Concato, J., Brophy, M., Fiore, L., Pyarajan, S., Breeling, J., Whitbourne, S., Deen, J., Shannon, C., Humphries, D., et al. (2016). Million Veteran Program: A mega-biobank to study genetic influences on health and disease. *J Clin Epidemiol* 70, 214-223.
  37. Friedewald, W.T., Levy, R.I., and Fredrickson, D.S. (1972). Estimation of the concentration of low-density lipoprotein cholesterol in plasma, without use of the preparative ultracentrifuge. *Clin Chem* 18, 499-502.
  38. Westerman, K.E., Pham, D.T., Hong, L., Chen, Y., Sevilla-Gonzalez, M., Sung, Y.J., Sun, Y.V., Morrison, A.C., Chen, H., and Manning, A.K. (2021). GEM: scalable and flexible gene-environment interaction analysis in millions of samples. *Bioinformatics* 37, 3514-3520.
  39. Kraft, P., Yen, Y.C., Stram, D.O., Morrison, J., and Gauderman, W.J. (2007). Exploiting gene-environment interaction to detect genetic associations. *Hum Hered* 63, 111-119.
  40. Winkler, T.W., Day, F.R., Croteau-Chonka, D.C., Wood, A.R., Locke, A.E., Magi, R., Ferreira, T., Fall, T., Graff, M., Justice, A.E., et al. (2014). Quality control and conduct of genome-wide association meta-analyses. *Nat Protoc* 9, 1192-1212.

41. Willer, C.J., Li, Y., and Abecasis, G.R. (2010). METAL: fast and efficient meta-analysis of genomewide association scans. *Bioinformatics* 26, 2190-2191.
42. Winkler, T.W., Kutalik, Z., Gorski, M., Lottaz, C., Kronenberg, F., and Heid, I.M. (2015). EasyStrata: evaluation and visualization of stratified genome-wide association meta-analysis data. *Bioinformatics* 31, 259-261.
43. Thomas, D. (2010). Methods for investigating gene-environment interactions in candidate pathway and genome-wide association studies. *Annu Rev Public Health* 31, 21-36.
44. Altman, D.G., and Bland, J.M. (2003). Interaction revisited: the difference between two estimates. *BMJ* 326, 219.
45. Watanabe, K., Taskesen, E., van Bochoven, A., and Posthuma, D. (2017). Functional mapping and annotation of genetic associations with FUMA. *Nat Commun* 8, 1826.
46. Boughton, A.P., Welch, R.P., Flickinger, M., VandeHaar, P., Taliun, D., Abecasis, G.R., and Boehnke, M. (2021). LocusZoom.js: interactive and embeddable visualization of genetic association study results. *Bioinformatics* 37, 3017-3018.
47. Pruim, R.J., Welch, R.P., Sanna, S., Teslovich, T.M., Chines, P.S., Gliedt, T.P., Boehnke, M., Abecasis, G.R., and Willer, C.J. (2010). LocusZoom: regional visualization of genome-wide association scan results. *Bioinformatics* 26, 2336-2337.
48. Boyle, A.P., Hong, E.L., Hariharan, M., Cheng, Y., Schaub, M.A., Kasowski, M., Karczewski, K.J., Park, J., Hitz, B.C., Weng, S., et al. (2012). Annotation of functional variation in personal genomes using RegulomeDB. *Genome Res* 22, 1790-1797.
49. Ghousaini, M., Mountjoy, E., Carmona, M., Peat, G., Schmidt, E.M., Hercules, A., Fumis, L., Miranda, A., Carvalho-Silva, D., Buniello, A., et al. (2021). Open Targets Genetics: systematic identification of trait-associated genes using large-scale genetics and functional genomics. *Nucleic Acids Res* 49, D1311-D1320.
50. Gagliano Taliun, S.A., VandeHaar, P., Boughton, A.P., Welch, R.P., Taliun, D., Schmidt, E.M., Zhou, W., Nielsen, J.B., Willer, C.J., Lee, S., et al. (2020). Exploring and visualizing large-scale genetic associations by using PheWeb. *Nat Genet* 52, 550-552.
51. Groza, T., Gomez, F.L., Mashhadi, H.H., Munoz-Fuentes, V., Gunes, O., Wilson, R., Cacheiro, P., Frost, A., Keskiivali-Bond, P., Vardal, B., et al. (2023). The International Mouse Phenotyping Consortium: comprehensive knockout phenotyping underpinning the study of human disease. *Nucleic Acids Res* 51, D1038-D1045.
52. Ramos, E.M., Hoffman, D., Junkins, H.A., Maglott, D., Phan, L., Sherry, S.T., Feolo, M., and Hindorff, L.A. (2014). Phenotype-Genotype Integrator (PheGenI): synthesizing

- genome-wide association study (GWAS) data with existing genomic resources. *Eur J Hum Genet* 22, 144-147.
53. Kavousi, M., Bos, M.M., Barnes, H.J., Lino Cardenas, C.L., Wong, D., Lu, H., Hodonsky, C.J., Landsmeer, L.P.L., Turner, A.W., Kho, M., et al. (2023). Multi-ancestry genome-wide study identifies effector genes and druggable pathways for coronary artery calcification. *Nat Genet* 55, 1651-1664.
54. Wang, Y., Mei, H., Jiang, Y.R., Sun, W.Q., Song, Y.J., Liu, S.J., and Jiang, F. (2015). Relationship between Duration of Sleep and Hypertension in Adults: A Meta-Analysis. *J Clin Sleep Med* 11, 1047-1056.
55. Qiu, Y., Li, X., Zhang, X., Wang, W., Chen, J., Liu, Y., Fang, X., Ni, X., Zhang, J., Wang, S., et al. (2022). Prothrombotic Factors in Obstructive Sleep Apnea: A Systematic Review With Meta-Analysis. *Ear Nose Throat J* 101, NP412-NP421.
56. Diaz-Roman, A., Mitchell, R., and Cortese, S. (2018). Sleep in adults with ADHD: Systematic review and meta-analysis of subjective and objective studies. *Neurosci Biobehav Rev* 89, 61-71.
57. Dashti, H.S., Jones, S.E., Wood, A.R., Lane, J.M., van Hees, V.T., Wang, H., Rhodes, J.A., Song, Y., Patel, K., Anderson, S.G., et al. (2019). Genome-wide association study identifies genetic loci for self-reported habitual sleep duration supported by accelerometer-derived estimates. *Nat Commun* 10, 1100.
58. Jones, S.E., Lane, J.M., Wood, A.R., van Hees, V.T., Tyrrell, J., Beaumont, R.N., Jeffries, A.R., Dashti, H.S., Hillsdon, M., Ruth, K.S., et al. (2019). Genome-wide association analyses of chronotype in 697,828 individuals provides insights into circadian rhythms. *Nat Commun* 10, 343.
59. Dashti, H.S., Daghlas, I., Lane, J.M., Huang, Y., Udler, M.S., Wang, H., Ollila, H.M., Jones, S.E., Kim, J., Wood, A.R., et al. (2021). Genetic determinants of daytime napping and effects on cardiometabolic health. *Nat Commun* 12, 900.
60. Jansen, P.R., Watanabe, K., Stringer, S., Skene, N., Bryois, J., Hammerschlag, A.R., de Leeuw, C.A., Benjamins, J.S., Munoz-Manchado, A.B., Nagel, M., et al. (2019). Genome-wide analysis of insomnia in 1,331,010 individuals identifies new risk loci and functional pathways. *Nat Genet* 51, 394-403.
61. Liu, Y., Corcoran, M., Rasool, O., Ivanova, G., Ibbotson, R., Grandeur, D., Iyengar, A., Baranova, A., Kashuba, V., Merup, M., et al. (1997). Cloning of two candidate tumor suppressor genes within a 10 kb region on chromosome 13q14, frequently deleted in chronic lymphocytic leukemia. *Oncogene* 15, 2463-2473.

62. Sakaue, S., Kanai, M., Tanigawa, Y., Karjalainen, J., Kurki, M., Koshiba, S., Narita, A., Konuma, T., Yamamoto, K., Akiyama, M., et al. (2021). A cross-population atlas of genetic associations for 220 human phenotypes. *Nat Genet* 53, 1415-1424.
63. de Oliveira Otto, M.C., Lemaitre, R.N., Sun, Q., King, I.B., Wu, J.H.Y., Manichaikul, A., Rich, S.S., Tsai, M.Y., Chen, Y.D., Fornage, M., et al. (2018). Genome-wide association meta-analysis of circulating odd-numbered chain saturated fatty acids: Results from the CHARGE Consortium. *PLoS One* 13, e0196951.
64. Tachmazidou, I., Suveges, D., Min, J.L., Ritchie, G.R.S., Steinberg, J., Walter, K., Iotchkova, V., Schwartzentruber, J., Huang, J., Memari, Y., et al. (2017). Whole-Genome Sequencing Coupled to Imputation Discovers Genetic Signals for Anthropometric Traits. *Am J Hum Genet* 100, 865-884.
65. Pulit, S.L., Stoneman, C., Morris, A.P., Wood, A.R., Glastonbury, C.A., Tyrrell, J., Yengo, L., Ferreira, T., Marouli, E., Ji, Y., et al. (2019). Meta-analysis of genome-wide association studies for body fat distribution in 694 649 individuals of European ancestry. *Hum Mol Genet* 28, 166-174.
66. Vuckovic, D., Bao, E.L., Akbari, P., Lareau, C.A., Mousas, A., Jiang, T., Chen, M.H., Raffield, L.M., Tardaguila, M., Huffman, J.E., et al. (2020). The Polygenic and Monogenic Basis of Blood Traits and Diseases. *Cell* 182, 1214-1231 e1211.
67. Plotnikov, D., Huang, Y., Khawaja, A.P., Foster, P.J., Zhu, Z., Guggenheim, J.A., and He, M. (2022). High Blood Pressure and Intraocular Pressure: A Mendelian Randomization Study. *Invest Ophthalmol Vis Sci* 63, 29.
68. Fernandez-Sanles, A., Sayols-Baixeras, S., Subirana, I., Senti, M., Perez-Fernandez, S., de Castro Moura, M., Esteller, M., Marrugat, J., and Elosua, R. (2021). DNA methylation biomarkers of myocardial infarction and cardiovascular disease. *Clin Epigenetics* 13, 86.
69. Jones, S.E., van Hees, V.T., Mazzotti, D.R., Marques-Vidal, P., Sabia, S., van der Spek, A., Dashti, H.S., Engmann, J., Kocevskaja, D., Tyrrell, J., et al. (2019). Genetic studies of accelerometer-based sleep measures yield new insights into human sleep behaviour. *Nat Commun* 10, 1585.
70. Campos, A.I., Ingold, N., Huang, Y., Mitchell, B.L., Kho, P.F., Han, X., Garcia-Marin, L.M., Ong, J.S., and Me Research, T., Law, M.H., et al. (2023). Discovery of genomic loci associated with sleep apnea risk through multi-trait GWAS analysis with snoring. *Sleep* 46.

71. Pell, V.R., Chouchani, E.T., Frezza, C., Murphy, M.P., and Krieg, T. (2016). Succinate metabolism: a new therapeutic target for myocardial reperfusion injury. *Cardiovasc Res* 111, 134-141.
72. Osuna-Prieto, F.J., Martinez-Tellez, B., Ortiz-Alvarez, L., Di, X., Jurado-Fasoli, L., Xu, H., Ceperuelo-Mallafre, V., Nunez-Roa, C., Kohler, I., Segura-Carretero, A., et al. (2021). Elevated plasma succinate levels are linked to higher cardiovascular disease risk factors in young adults. *Cardiovasc Diabetol* 20, 151.
73. Jang, I.K., Weissman, N.J., Picard, M.H., Zile, M.R., Pettigrew, V., Shen, S., Tatsuno, J., Hibberd, M.G., Tzivoni, D., Wackers, F.J., et al. (2008). A randomized, double-blind, placebo-controlled study of the safety and efficacy of intravenous MCC-135 as an adjunct to primary percutaneous coronary intervention in patients with acute myocardial infarction: Evaluation of MCC-135 for left ventricular salvage in acute myocardial infarction (EVOLVE). *Am Heart J* 155, 113 e111-118.
74. Kawasumi, H., Satoh, N., and Kitada, Y. (2007). Caldaret, an intracellular Ca<sup>2+</sup> handling modulator, limits infarct size of reperfused canine heart. *J Pharmacol Sci* 103, 222-233.
75. Takeuchi, F., Liang, Y.Q., Isono, M., Ang, M.Y., Mori, K., and Kato, N. (2022). Transcriptomic Response in the Heart and Kidney to Different Types of Antihypertensive Drug Administration. *Hypertension* 79, 413-423.
76. Wang, Y., Li, C.X., Lin, Y.N., Zhang, L.Y., Li, S.Q., Zhang, L., Yan, Y.R., Lu, F.Y., Li, N., and Li, Q.Y. (2021). The Role of Aldosterone in OSA and OSA-Related Hypertension. *Front Endocrinol (Lausanne)* 12, 801689.
77. Murck, H., Uhr, M., Ziegenbein, M., Kunzel, H., Held, K., Antonijevic, I.A., Schussler, P., and Steiger, A. (2006). Renin-angiotensin-aldosterone system, HPA-axis and sleep-EEG changes in unmedicated patients with depression after total sleep deprivation. *Pharmacopsychiatry* 39, 23-29.
78. Thompson, B., Waterhouse, M., English, D.R., McLeod, D.S., Armstrong, B.K., Baxter, C., Duarte Romero, B., Ebeling, P.R., Hartel, G., Kimlin, M.G., et al. (2023). Vitamin D supplementation and major cardiovascular events: D-Health randomised controlled trial. *BMJ* 381, e075230.
79. Emerging Risk Factors Collaboration and Epic- C. V. D. Vitamin D. Studies Collaboration. (2024). Estimating dose-response relationships for vitamin D with coronary heart disease, stroke, and all-cause mortality: observational and Mendelian randomisation analyses. *Lancet Diabetes Endocrinol* 12, e2-e11.



80. Martinez-Sena, T., Soluyanova, P., Guzman, C., Valdivielso, J.M., Castell, J.V., and Jover, R. (2020). The Vitamin D Receptor Regulates Glycerolipid and Phospholipid Metabolism in Human Hepatocytes. *Biomolecules* 10.
81. Kichaev, G., Bhatia, G., Loh, P.R., Gazal, S., Burch, K., Freund, M.K., Schoech, A., Pasaniuc, B., and Price, A.L. (2019). Leveraging Polygenic Functional Enrichment to Improve GWAS Power. *Am J Hum Genet* 104, 65-75.
82. Szeto, F.L., Reardon, C.A., Yoon, D., Wang, Y., Wong, K.E., Chen, Y., Kong, J., Liu, S.Q., Thadhani, R., Getz, G.S., et al. (2012). Vitamin D receptor signaling inhibits atherosclerosis in mice. *Mol Endocrinol* 26, 1091-1101.
83. Bertisch, S.M., Sillau, S., de Boer, I.H., Szklo, M., and Redline, S. (2015). 25-Hydroxyvitamin D Concentration and Sleep Duration and Continuity: Multi-Ethnic Study of Atherosclerosis. *Sleep* 38, 1305-1311.
84. Abboud, M. (2022). Vitamin D Supplementation and Sleep: A Systematic Review and Meta-Analysis of Intervention Studies. *Nutrients* 14.
85. Jackson, C.L., Patel, S.R., Jackson, W.B., 2nd, Lutsey, P.L., and Redline, S. (2018). Agreement between self-reported and objectively measured sleep duration among white, black, Hispanic, and Chinese adults in the United States: Multi-Ethnic Study of Atherosclerosis. *Sleep* 41.
86. Chung, J., Goodman, M., Huang, T., Bertisch, S., and Redline, S. (2021). Multidimensional sleep health in a diverse, aging adult cohort: Concepts, advances, and implications for research and intervention. *Sleep Health* 7, 699-707.
87. Arora, N., Richmond, R.C., Brumpton, B.M., Asvold, B.O., Dalen, H., Skarpsno, E.S., and Strand, L.B. (2023). Self-reported insomnia symptoms, sleep duration, chronotype and the risk of acute myocardial infarction (AMI): a prospective study in the UK Biobank and the HUNT Study. *Eur J Epidemiol* 38, 643-656.
88. Arora, N., Bhatta, L., Skarpsno, E.S., Dalen, H., Asvold, B.O., Brumpton, B.M., Richmond, R.C., and Strand, L.B. (2023). Investigating the causal interplay between sleep traits and risk of acute myocardial infarction: a Mendelian randomization study. *BMC Med* 21, 385.

**Table 1:** Nine variants identified through the 1 degree of freedom interaction analyses in the meta-analyses of men and women combined

| Variant          | RSid         | Effect allele | Exposure | Trait | EAF    | Sample Size | Sample | Mapped gene                                       | Interaction Beta | SE     | 1df p-value |
|------------------|--------------|---------------|----------|-------|--------|-------------|--------|---------------------------------------------------|------------------|--------|-------------|
| 2:184828292:C_T  | rs190975828  | C             | STST     | TG    | 0.9909 | 557,910     | CPMA   | <i>ZNF804A</i>                                    | -0.102           | 0.0171 | 2.99E-09    |
| 2:186808058:G_T  | rs6760240    | G             | STST     | TG    | 0.0075 | 188,049     | CPMA   | <i>ZSWIM2</i>                                     | 0.184            | 0.0304 | 1.47E-09    |
| 3:162278901:A_T  | rs162278901  | A             | LTST     | LDL-c | 0.0062 | 41,379      | CPMA   | <i>OTOL1</i> <sup>1</sup>                         | 25.360           | 3.5968 | 1.78E-12    |
| 4:127678773:C_G  | rs192018195  | C             | LTST     | TG    | 0.9849 | 208,087     | EUR    | <i>INTU,</i><br><i>SLC25A31,</i><br><i>HSPA4L</i> | -0.0956          | 0.0145 | 4.81E-11    |
| 7:72156448:A_G   | rs573762901  | A             | LTST     | HDL-c | 0.0033 | 42,445      | CPMA   | <i>CALN1</i>                                      | 0.148            | 0.0230 | 1.43E-10    |
| 7:102460277:G_T  | rs543672875  | G             | STST     | HDL-c | 0.0024 | 42,445      | CPMA   | <i>ALKBH4</i>                                     | 0.140            | 0.0231 | 1.51E-09    |
| 8:61617696:C_T   | rs147261056  | T             | LTST     | TG    | 0.0071 | 212,110     | CPMA   | <i>CLVS1, ASPH</i>                                | 0.185            | 0.0253 | 2.78E-13    |
| 11:10411707:C_CT | rs1847639939 | C             | LTST     | LDL-c | 0.4588 | 654,182     | CPMA   | <i>AMPD3</i>                                      | 0.934            | 0.1594 | 4.72E-09    |
| 13:50374420:C_T  | rs14172636   | C             | STST     | HDL-c | 0.9919 | 196,379     | CPMA   | <i>DLEU1</i>                                      | 0.132            | 0.0190 | 4.10E-12    |
| 13:50374420:C_T  | rs14172636   | C             | STST     | TG    | 0.9913 | 188,528     | CPMA   | <i>DLEU1</i>                                      | -0.266           | 0.0325 | 2.40E-16    |

Abbreviations: CPMA, Cross Population Meta-Analysis; EAF, Effect Allele Frequency; EUR, European; HDL-c, High-Density Lipoprotein

Cholesterol; LDL-c, LowDensity Lipoprotein Cholesterol; SE, standard error; TG, Triglycerides. 1) Identified variant not found in FUMA or in

LocusZoom, *OTOL1* gene is closest gene.

**Table 2:** Additional 7 variants identified through the 2 degree of freedom interaction analyses after prioritization for joint effects in the meta-analyses of men and women combined

| Variant         | RSid        | Exposure | Effect allele | Trait | EAF    | Sample Size | Sample | Mapped gene                            | 2df joint p-value | Interaction Beta | SE     | 1df interaction p-value |
|-----------------|-------------|----------|---------------|-------|--------|-------------|--------|----------------------------------------|-------------------|------------------|--------|-------------------------|
| 20:51830403:A_G | rs150607032 | STST     | A             | TG    | 0.0066 | 532,172     | CPMA   | <i>APT9A, NFATC2, SALL4</i>            | 1.77E-17          | 0.098            | 0.0178 | 3.59E-08                |
| 11:13058160:C_T | rs59374498  | LTST     | C             | TG    | 0.9752 | 661,725     | CPMA   | <i>TEAD1, RASSF10</i>                  | 3.34E-38          | -0.0358          | 0.0066 | 5.71E-08                |
| 10:97769146:A_G | rs191757273 | LTST     | A             | LDL-c | 0.0023 | 52,159      | CPMA   | <i>PYROXD2</i>                         | 8.51E-16          | -23.9315         | 4.4475 | 7.41E-08                |
| 21:35272725:A_T | rs114083564 | STST     | A             | TG    | 0.9855 | 43,202      | CPMA   | <i>RUNX1</i>                           | 4.45E-29          | 0.1284           | 0.0261 | 8.40E-07                |
| 18:55378517:A_T | rs9949541   | LTST     | A             | HDL-c | 0.9748 | 71,290      | CPMA   | <i>TCF4</i>                            | 2.64E-73          | 0.0478           | 0.01   | 1.92E-06                |
| 2:40094191:A_T  | rs34771893  | STST     | A             | TG    | 0.0055 | 557,910     | CPMA   | <i>SLC8A1</i>                          | 1.97E-18          | 0.1018           | 0.0221 | 4.12E-06                |
| 20:23353740:A_G | rs73319497  | STST     | A             | TG    | 0.9781 | 666,234     | CPMA   | <i>GZF1, NAPB, CASTLI, CST11, NXT1</i> | 4.31E-32          | -0.036           | 0.0078 | 4.47E-06                |

Abbreviations: CPMA, Cross Population Meta-analysis; EAF, Effect Allele Frequency; HDL-c, High-Density Lipoprotein Cholesterol; LDL-c,

Low-Density Lipoprotein Cholesterol; SE, standard error; TG, Triglycerides.

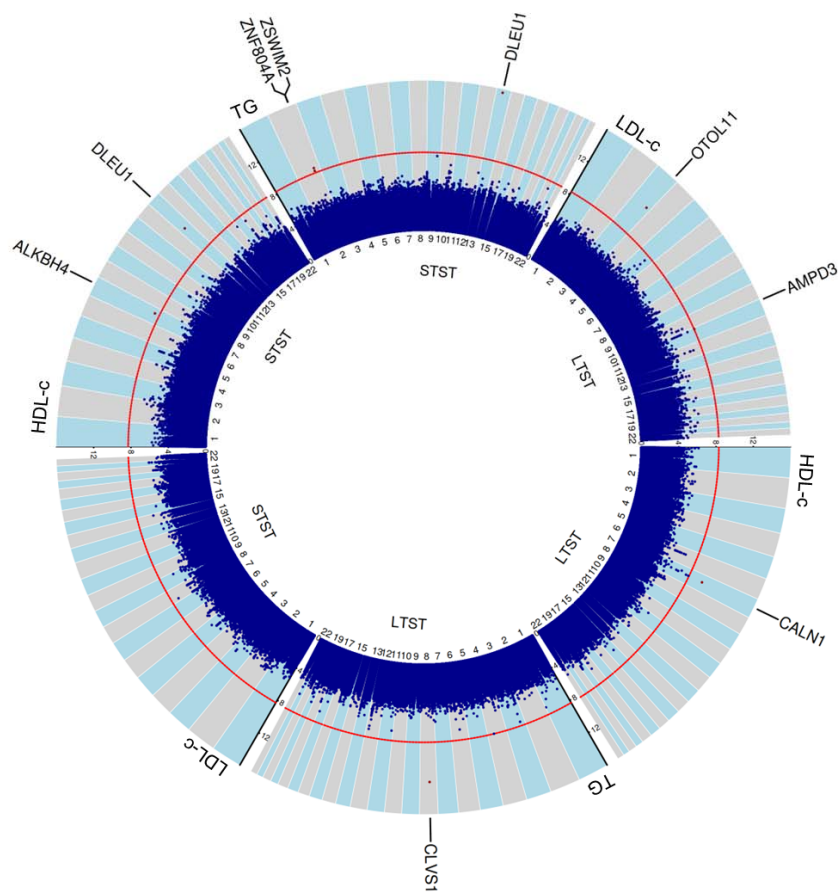

**Figure 1: Circular  $-\log_{10}(P_{int})$  plot of all the 6 main analyses in the cross-population meta-analysis of men and women combined. ASPH (TG and LTST) maps also at the *CLVS1* locus.**

### 2:184828292:C\_T (STST and TG)

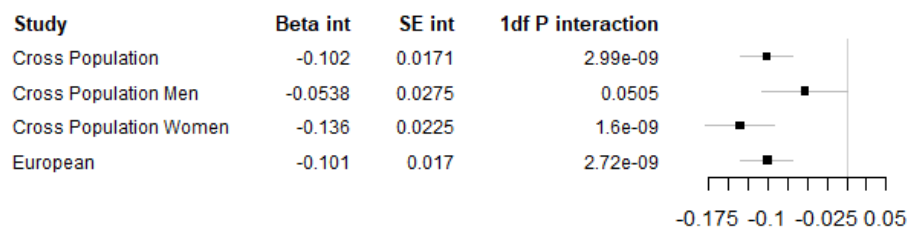

### 2:186808058:G\_T (STST and TG)

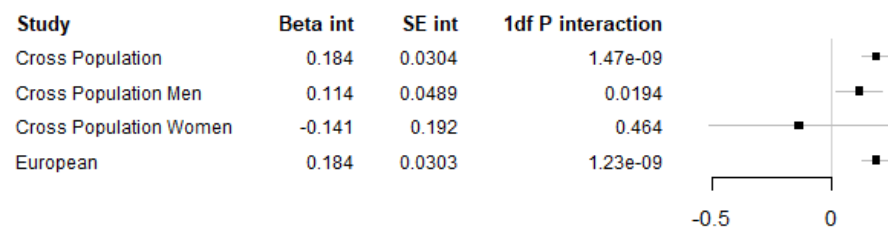

### 3:162278901:A\_T (LTST and LDL-c)

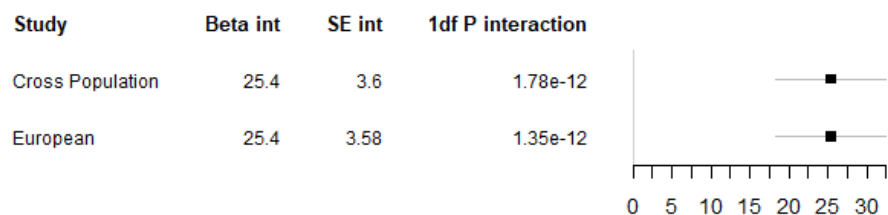

### 4:127678773:C\_G (LTST and TG)

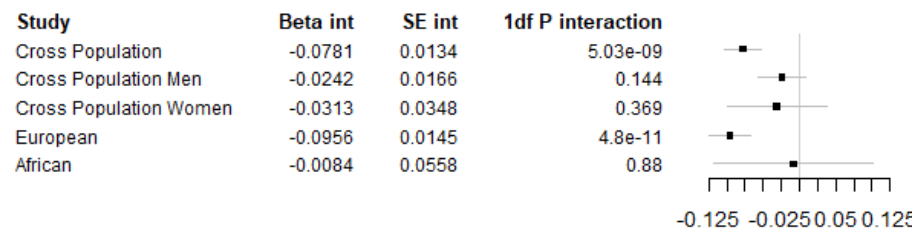

### 7:72156448:A\_G (LTST and HDL-c)

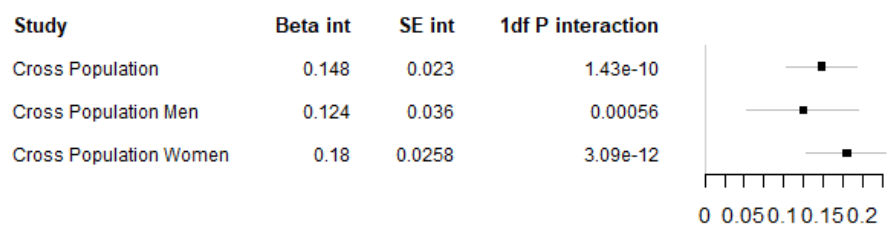

### 7:102460277:G\_T (STST and HDL-c)

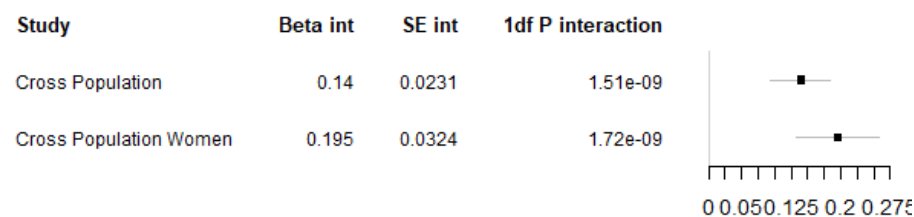

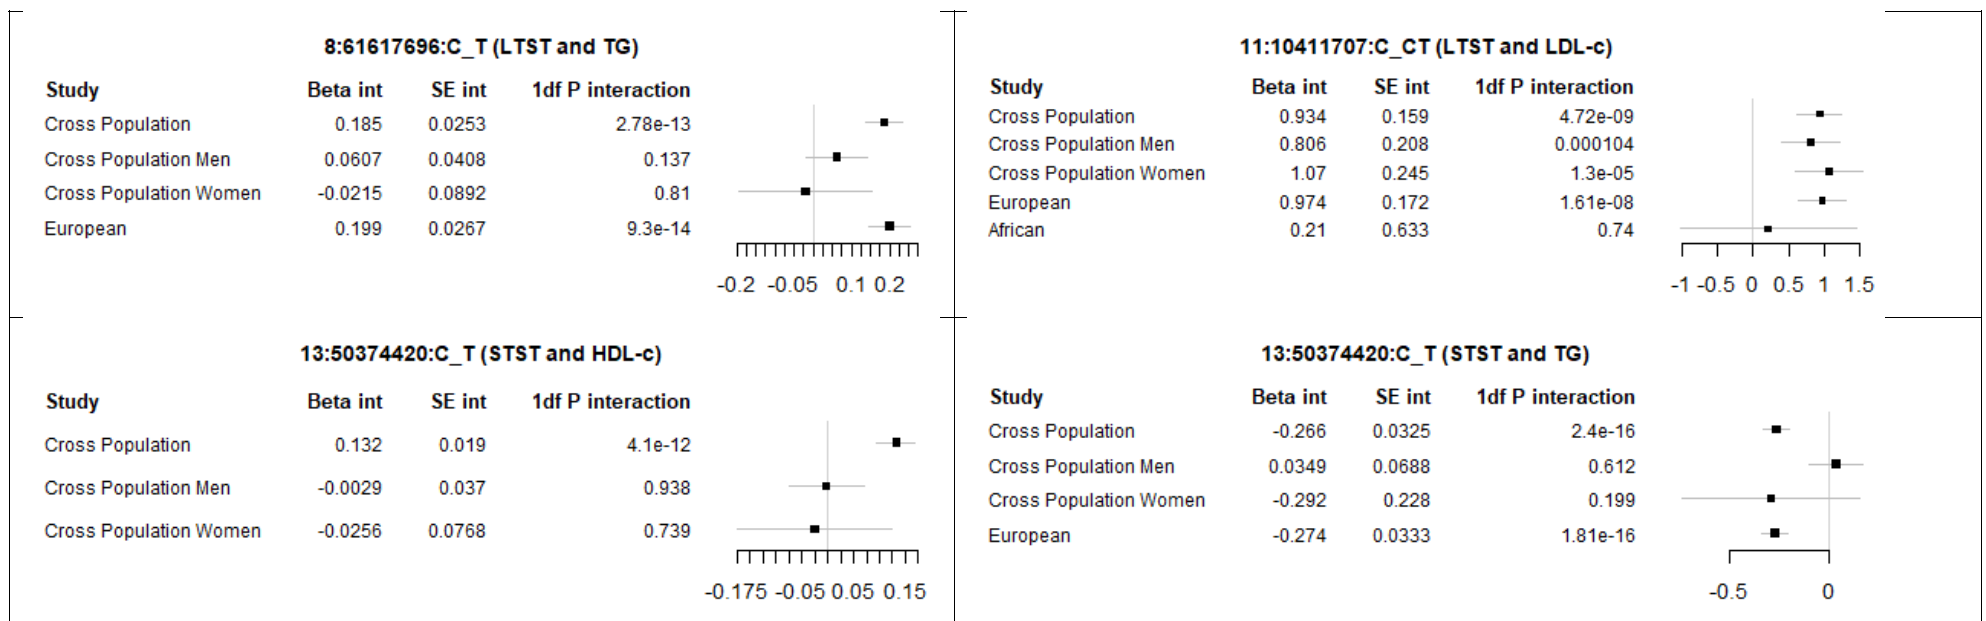

**Figure 2: Main results from the 1-degree of freedom interaction analyses in different subgroups.** Presented results are the additive variant-interaction effects (log units for TG and HDL-c; mg/dL). Only variants passing all post meta-analysis QC steps were presented. Abbreviations: HDL-c, high-density lipoprotein cholesterol. LDL-c, low-density lipoprotein cholesterol; LTST, long total sleep time; STST, short total sleep time; TG, triglycerides.

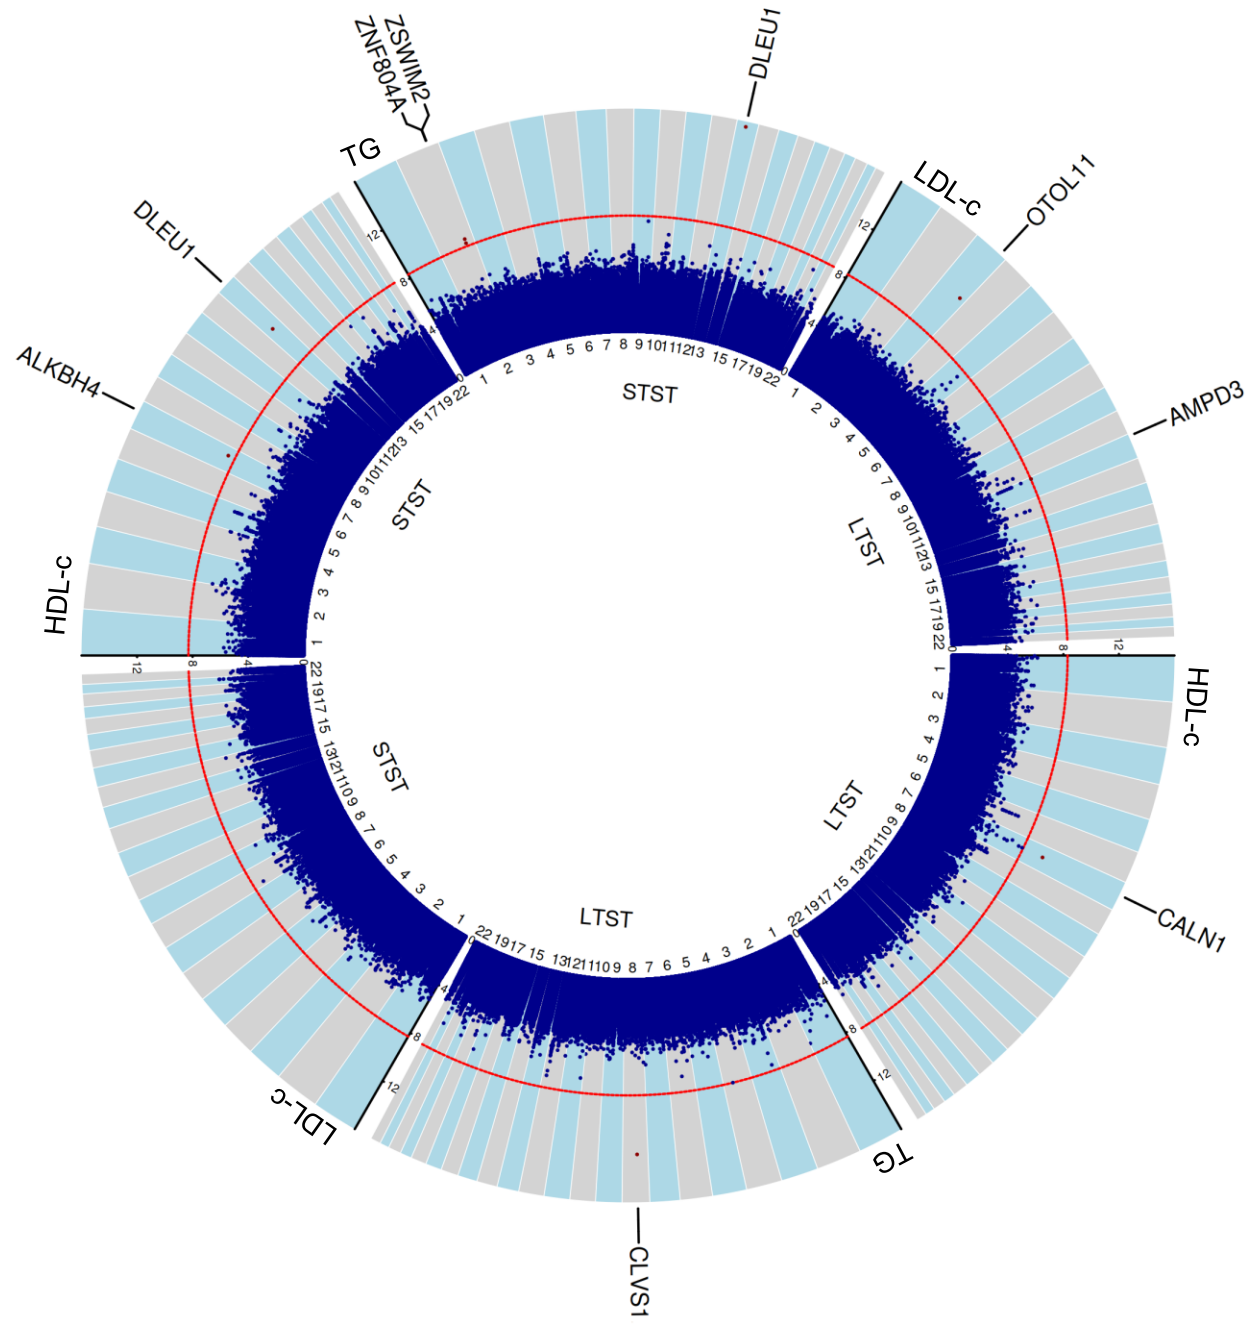

Source: https://medrxiv.org/content/10.1101/2024.09.02.24312466v2.full.pdf
